# Supplementary material for: A Boolean view separates platelet activatory and inhibitory signalling as verified by phosphorylation monitoring including threshold behaviour and integrin modulation
Source: Royal Society of Chemistry journal article supplement (doi:10.1039/c3mb25597b), 2013-02-12
Supplement: c3mb25597b.xlsx [file c3mb25597b.xlsx]

## Sheet: Sheet1
edge		reference
GPVI->PLCB		69
PLCB->IP3		20
PLCB->DAG		19
DAG->PKC		35
IP3->IP3R		36
IP3R->CaC		36
CaC->Orai1		29
Orai1->CaC		29
P2X1->CaC		30
PKC->Src		38
PI3->Akt		71
Src->Akt		40
CaC->ADP		42.65
ADP->P2Y1		72
ADP->P2Y12		16
CaC->CalDAG		37
CalDAG->RAP1		37
RAP1->Talin		73
ATP->P2X1		74
P2X1->CaC		74
P2Y1->PLCB		72.75
P2Y12->cAMP		75
P2Y12->PI2		75
P2Y1->PLA2		17
PLA2->ARAC		76
ARAC->TXA		77
TXA2R->PLCB		78
TXA2R->RhoK		79
RhoK->cellshape		80.81
Talin->Inta2b3		82
PTGDR->cAMP		83
cAMP->PKA		84
PKA->Rap1		85
PKA->VASP		25
PKA->RhoK		86
PKA->PDE3		26
Akt->Integrin		21
PKA->IP3R		24
PKA->Src		23
Integrin->Arac		87
